# Supplementary material for: Polarization-induced NO2 sensing and amine generation using Sb single-atoms embedded in few-layered MnPS3 flatlands
Source: Royal Society of Chemistry journal article supplement (doi:10.1039/d5ta01445j), 2025-01-01
Supplement: d5ta01445j1.pdf [file d5ta01445j1.pdf]

# Supplementary Information

## Polarization Induced NO<sub>2</sub> Sensing and Amine Generation using Sb Single-Atoms Embedded in Few-Layered MnPS<sub>3</sub> Flatlands

*Nirman Chakraborty,<sup>1,2\*</sup> Souvik Bhattacharjee<sup>3</sup>, Anagha Ghosh<sup>2</sup>, Efrat Lifshitz<sup>4</sup>, Swastik Mondal<sup>2,5\*</sup>*

<sup>1</sup>Eduard Zintl Institute of Inorganic and Physical Chemistry, Technical University of Darmstadt, 64287 Darmstadt, Germany

<sup>2</sup>CSIR-Central Glass and Ceramic Research Institute, 196, Raja S. C. Mullick Road, Jadavpur, Kolkata 700032, India

<sup>3</sup>School of Physical Sciences, Indian Association for the Cultivation of Science, 2A & B Raja S. C. Mullick Road, Kolkata 700032, India

<sup>4</sup>Schulich Faculty of Chemistry, Solid State Institute, Russel Berrie Nanotechnology Institute, Grand Program for Energy and the Helen Diller Quantum Center, Technion-Israel Institute of Technology, Haifa 3200003, Israel

<sup>5</sup>Academy of Scientific and Innovative Research (AcSIR), Ghaziabad-201002, India

## Contents

1. Structural parameters of pristine and nitrobenzene intercalated MnPS<sub>3</sub> single crystals
2. Synthesis of Sb/MnPS<sub>3</sub> and Sb Single Atoms (SAs)
3. Compositional analyses using SEM-EDX
4. TEM grid preparation and additional TEM images
5. XPS and BET results
6. Gas sensing and ORR experiments
7. Raman spectroscopy
8. Theoretical results

## 1. Structural parameters of pristine and nitrobenzene intercalated MnPS<sub>3</sub> single crystals

**Table S1.** Lattice parameters from SXRD measurements.

| Sample                             | MnPS <sub>3</sub>                      | Mn_NB_1                                 | Mn_NB_2                                 | Mn_NB_3                                |
|------------------------------------|----------------------------------------|-----------------------------------------|-----------------------------------------|----------------------------------------|
| Temp                               | 100 K                                  | 100 K                                   | 100 K                                   | 100 K                                  |
| Space group                        | C 1 2/m 1                              | C 1 2/m 1                               | C 1 2/m 1                               | C 1 2/m 1                              |
| Lattice parameters:                |                                        |                                         |                                         |                                        |
| <i>a</i> , <i>b</i> , <i>c</i> (Å) | 5.8032(3),<br>10.0574(5),<br>6.5978(5) | 5.8101(7),<br>10.0606(11),<br>7.8083(9) | 5.8096(7),<br>10.0596(10),<br>8.9093(9) | 5.8103(2),<br>10.0646(4),<br>9.6135(3) |
| $\alpha$ , $\beta$ (°)             | 90,107                                 | 90,107                                  | 90,107                                  | 90,107                                 |
| <i>V</i> (Å <sup>3</sup> )         | 385.08(4)                              | 456.41(8)                               | 520.67(8)                               | 562.18(3)                              |

## 2. Synthesis of Sb/MnPS<sub>3</sub> and Sb Single Atoms (SAs)

30 mg of KSb(OH)<sub>6</sub> was dissolved in 250 ml of ultrapure water and 250 mg of nitrobenzene intercalated MnPS<sub>3</sub> crystals (Mn\_NB\_3) were added under sonication for 20 min. The mixture was then stirred rigorously for 24 hours at room temperature and centrifuged. The crystals were washed with ethanol and vacuum dried at 80°C for 12 hours. The as-prepared crystals were transferred to an alumina boat and carbonized at 1000°C for 3 hours with heating rate of 5°C/min. The sample collected was soaked in dil. H<sub>2</sub>SO<sub>4</sub> for 6 hours to remove traces of metallic Sb and vacuum dried at 80°C for 12 hours. The concentration of SA loading was varied by increasing amount of KSb(OH)<sub>6</sub> precursor.

## 3. Compositional analyses using SEM-EDX

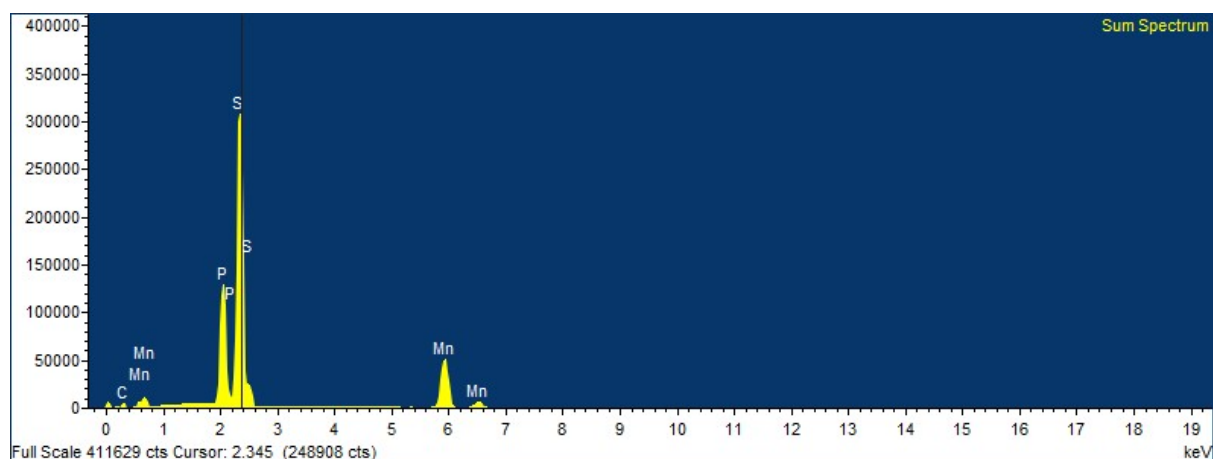

**Figure S1.** SEM-EDX qualitative estimation of MnPS<sub>3</sub> single crystals.

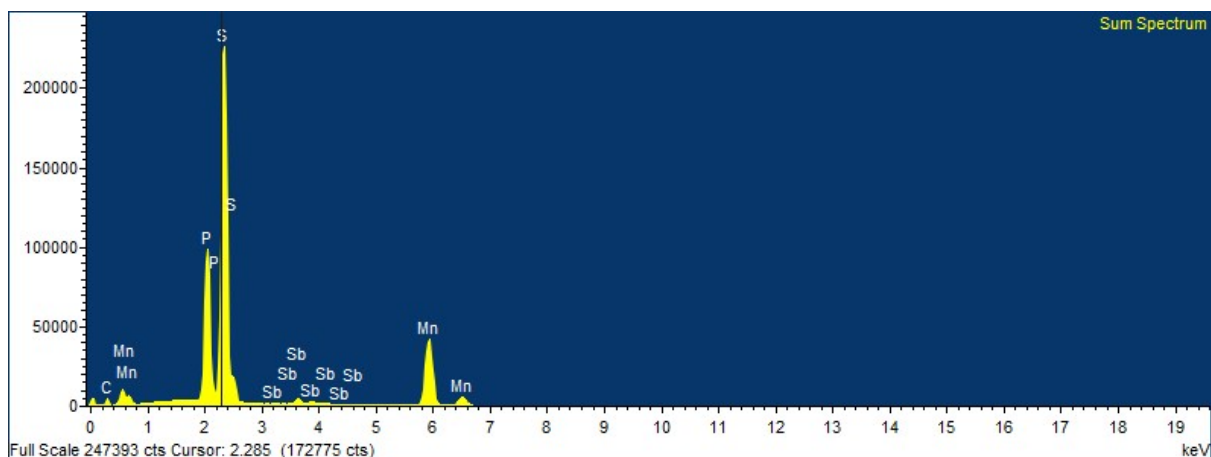

**Figure S2.** SEM-EDX qualitative estimation of Mn<sub>3.5</sub>Sb sample.

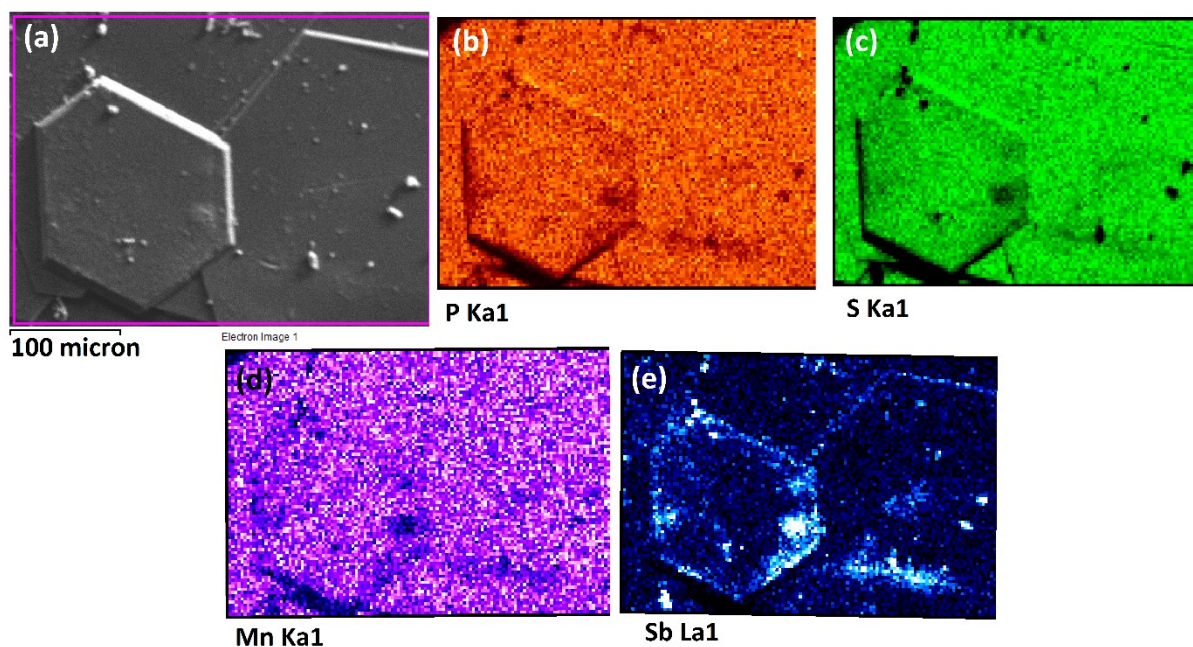

**Figure S3.** SEM-EDX colour mapping of Mn<sub>3.5</sub>Sb sample.

#### 4. TEM grid preparation and additional TEM images

Standard “Blue Tape” (Ultron systems, INC. Silicon Free Blue Adhesive Film P/N 1007R-6.0) was cut into small pieces, and the few layer crystals were transferred onto them by an antimagnetic tweezer. The scotch tape was now held between two pieces of weighing paper and the TEM grid (carbon coated Cu grid from Ted Pella Inc.) was placed on the exfoliated sample (attached to scotch tape) on the carbon side and rubbed gently with a third piece of weighing paper. The whole arrangement was transferred to a 2D heater at 80°C and rubbed gently on the grid to enable transfer of sample from scotch tape on grid. The residual organic

molecules (glue from scotch tape) were removed by heating the grids under vacuum at 120°C for 2 hours. The samples were then ready for loading in the TEM machine.

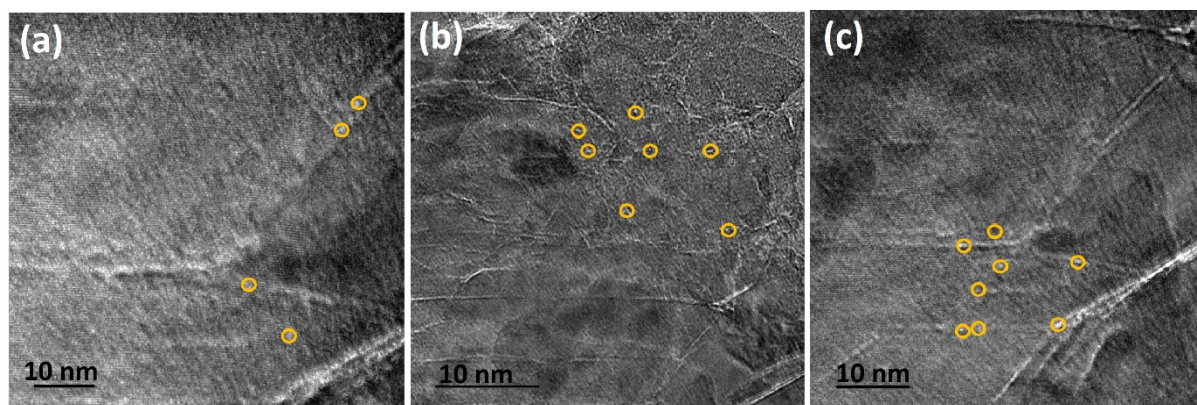

**Figure S4.** Bright field TEM images of (a) Mn\_Sb\_1.2 (b, c) Mn\_Sb\_2.0 samples, with Sb SAs highlighted in yellow colour circles.

## 5. XPS and BET results

**Table S2.** Values of binding energies (eV) of core-level spectra of different elements in all samples and their respective BET surface areas.

| Elements                             | MnPS <sub>3</sub> | Mn_NB_Sb_1.2  | Mn_NB_Sb_3.5  | Mn_NB_Sb_5    |
|--------------------------------------|-------------------|---------------|---------------|---------------|
| Mn 2p <sub>3/2</sub>                 | 640.51            | 640.44        | 640.23        | 640.33        |
| P-Sb (P 2p <sub>3/2</sub> )          | 134.17            | 134.21        | 134.25        | 134.22        |
| S 2p <sub>3/2</sub>                  | 161.76            | 161.70        | 161.32        | 161.21        |
| N 1s                                 | —                 |               |               |               |
| C-N/N-O                              | —                 | 400.13/402.04 | 400.13/402.04 | 400.13/402.04 |
| Sb 3d <sub>5/2</sub>                 | 530.0             | 530.89        | 530.94        | 529.98        |
| BET surface area (m <sup>2</sup> /g) | 43                | 75            | 103           | 105           |

**Table S3.** Quantitative estimation of surface Sb composition (per formula unit of MnPS<sub>3</sub>).

| Elements | MnPS <sub>3</sub> | Mn_NB_Sb_1.2 | Mn_NB_Sb_3.5 | Mn_NB_Sb_5 |
|----------|-------------------|--------------|--------------|------------|
| Mn 2p    | 1.002             | 1.002        | 1.002        | 1.002      |
| P 2p     | 1.010             | 1.009        | 1.007        | 1.009      |
| S 2p     | 2.998             | 2.995        | 2.988        | 2.994      |

|       |                                                                                   |       |       |       |
|-------|-----------------------------------------------------------------------------------|-------|-------|-------|
| Sb 3d |  | 1.172 | 3.411 | 4.759 |
|-------|-----------------------------------------------------------------------------------|-------|-------|-------|

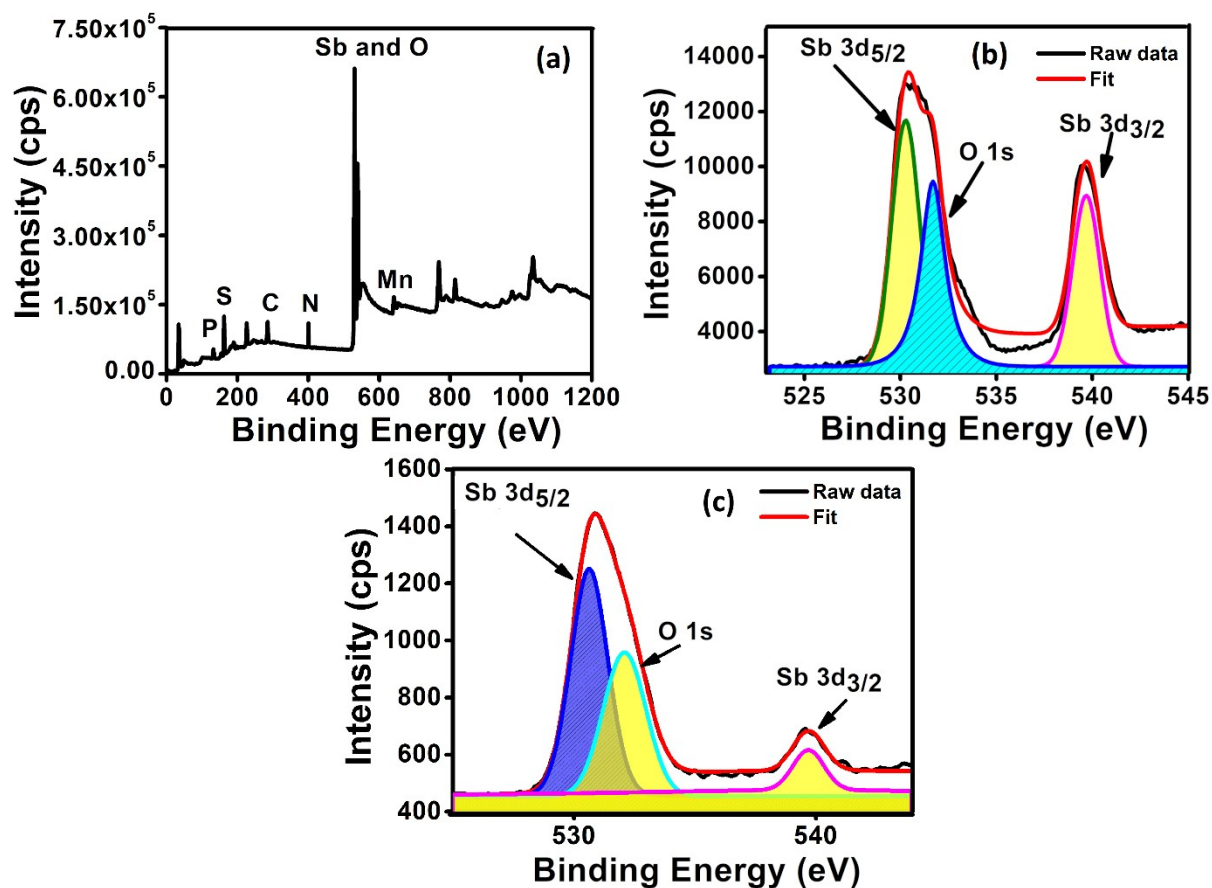

**Figure S5.** (a) Survey scan of Mn\_Sb\_3.5 sample, with all elements marked. (b) Sb 3d core level spectrum of Mn\_NB\_Sb\_1.2 sample. (c) Sb 3d core level spectrum of Mn\_NB\_Sb\_3.5 sample post catalytic measurements.

## 6. Gas sensing and ORR experiments

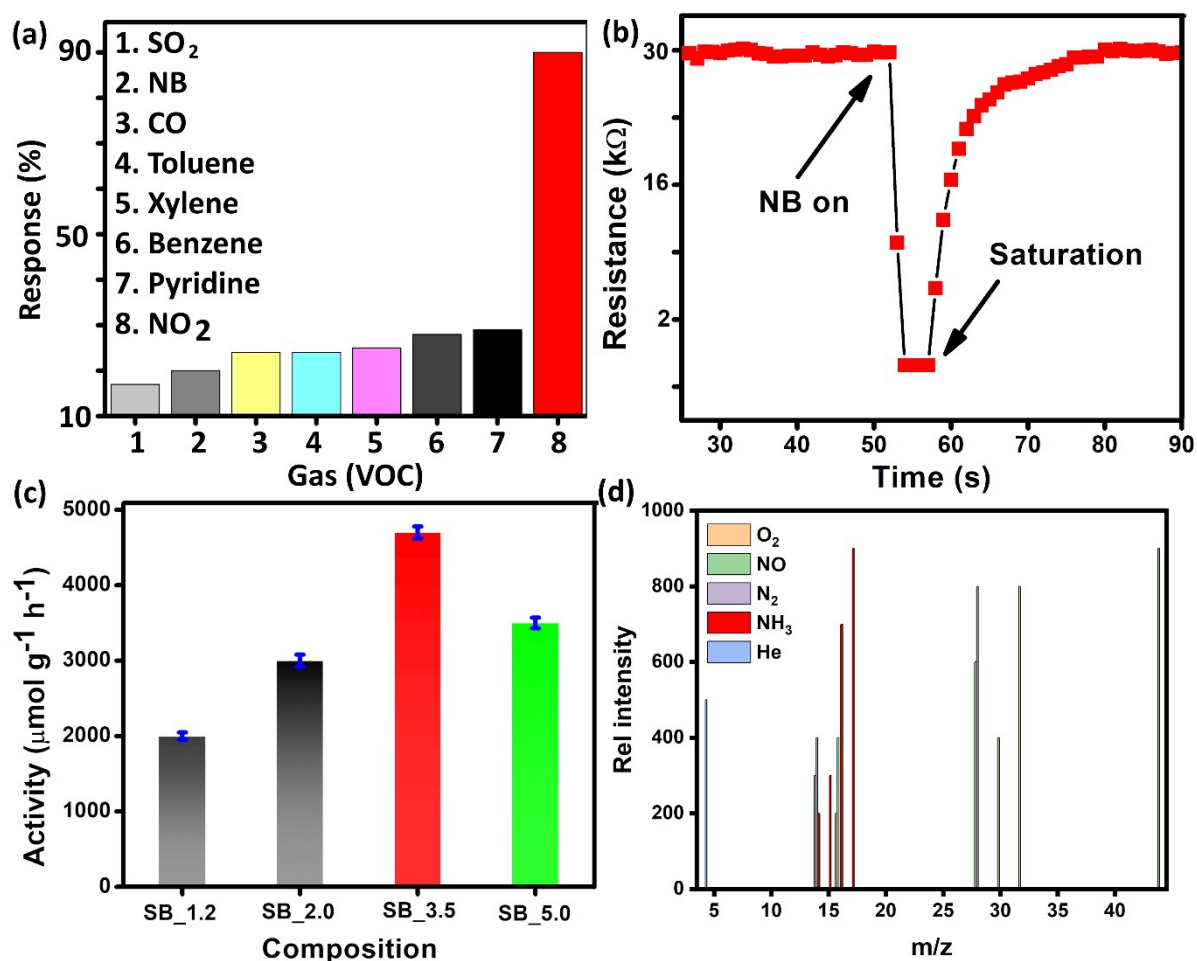

**Figure S6.** (a) Cross-sensitivity results of Mn\_NB\_Sb\_3.5 sample, under 10 ppm of different gases and VOCs, at room temperature, in presence of 50 μW green light, at  $\theta=50^\circ$ . (b) Dynamic response of Mn\_NB\_Sb\_3.5 sample, on saturation, with 10 ppm NO<sub>2</sub> in presence of 50 μW green light, at  $\theta=50^\circ$ . Response and recovery times were estimated as 10 s and 20 s, respectively. (c) Activity comparison of various compositions. (d) Gas chromatography results showing major components of catalytic reaction. <sup>[1-3]</sup>

**Table S4.** Error calculation in sensing measurements due to ambient light conditions.

| Sample       | Error (%) |
|--------------|-----------|
| Mn_NB_Sb_1.2 | 4.6       |
| Mn_NB_Sb_3.5 | 5.1       |



|              |     |
|--------------|-----|
| Mn_NB_Sb_5.0 | 5.6 |
|--------------|-----|

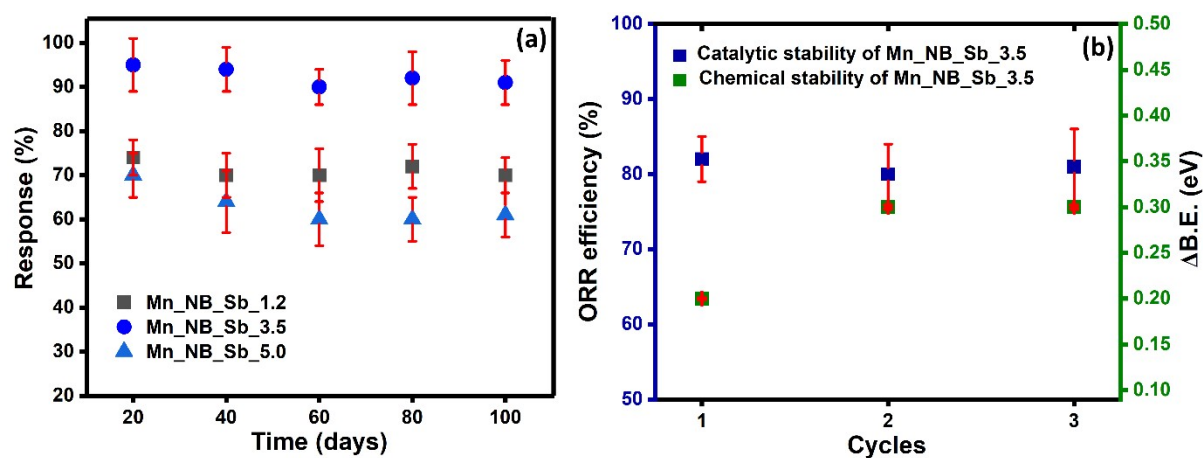

**Figure S7.** (a) Long term stability of the sensors with 10 ppm NO<sub>2</sub> in presence of 50 $\mu$ W green light, at  $\theta=50^\circ$  (b) Catalytic and chemical stability studies of Mn\_NB\_Sb\_3.5 sample over three consecutive cycles.

**Table S5.** Statistical estimation of errors (%) in response estimation in sensing measurements.

| $\theta^\circ$ | Mn_NB_Sb_1.2 | Mn_NB_Sb_3.5 | Mn_NB_Sb_5.0 |
|----------------|--------------|--------------|--------------|
| 0              | 1.2          | 1.4          | 2            |
| 30             | 2.7          | 2.1          | 2.2          |
| 60             | 1.4          | 1.8          | 2            |
| 90             | 1.7          | 1.8          | 1.6          |
| 120            | 1.1          | 1.8          | 1.9          |
| 150            | 2            | 1.3          | 1.6          |
| 180            | 1.6          | 2.5          | 1.4          |
| 210            | 2.4          | 2.2          | 2.1          |
| 240            | 2.2          | 2            | 2            |
| 270            | 2.8          | 2.3          | 2.5          |
| 300            | 2            | 1.9          | 2.6          |
| 330            | 1.7          | 1.9          | 1.8          |
| 360            | 1.9          | 1.6          | 1.5          |



## 7. Raman spectroscopy

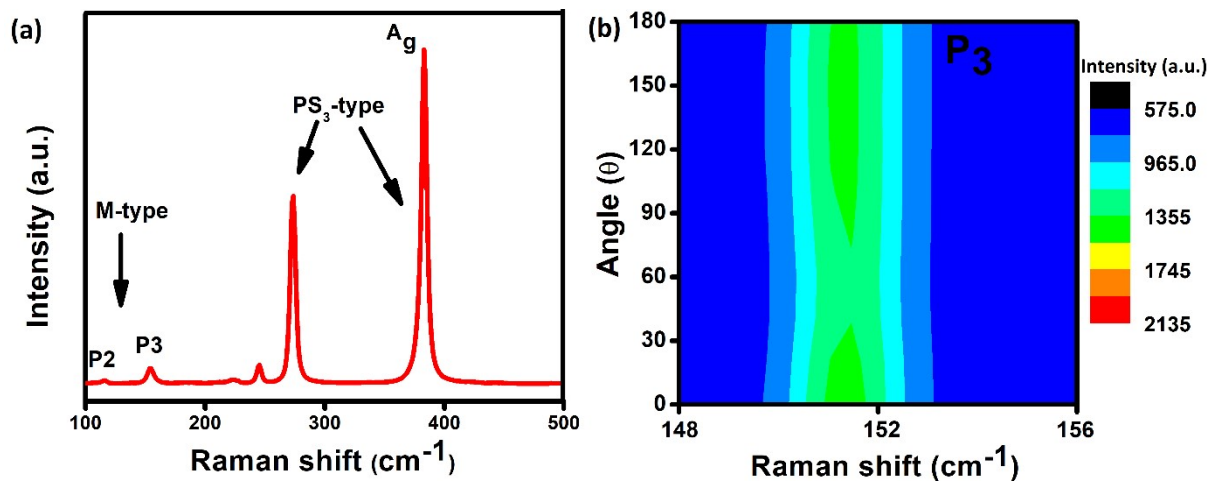

**Figure S8.** (a) Raman spectrum of MnPS<sub>3</sub> single crystal using a 532 nm laser source. (b) Polarization dependent Raman spectra of Mn\_NB\_3 sample, highlighting the P3 vibration mode (corresponding to the Mn<sup>2+</sup> vibrations).

## 8. Theoretical results

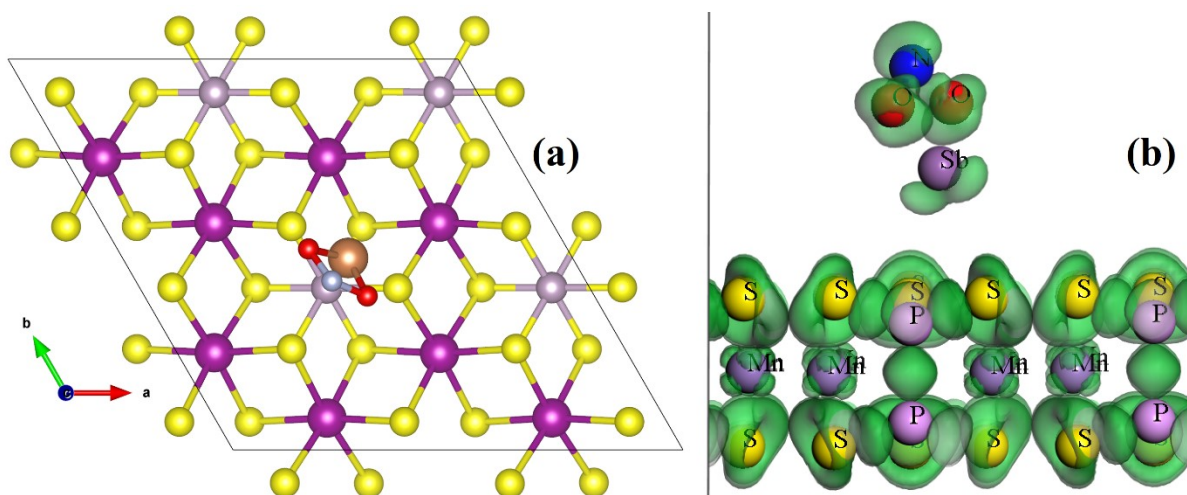

**Figure S9.** (a) Optimized atomic structure (top view) for NO<sub>2</sub> attached with single Sb atom over 2×2×1 supercell of MnPS<sub>3</sub> monolayer; (b) Electron density difference map (side view).

**Table S6.** Optimized Crystallographic parameters

### Optimized CIF of the MnPS<sub>3</sub> bulk

```
data_MnPS3
_symmetry_space_group_name_H-M 'C2/M'
_symmetry_Int_Tables_number 12
_symmetry_cell_setting monoclinic
loop_
_symmetry_equiv_pos_as_xyz
  x,y,z
  -x,y,-z
  -x,-y,-z
  x,-y,z
  x+1/2,y+1/2,z
  -x+1/2,y+1/2,-z
  -x+1/2,-y+1/2,-z
  x+1/2,-y+1/2,z
_cell_length_a 6.2422
_cell_length_b 11.0275
_cell_length_c 7.2324
_cell_angle_alpha 90.0000
_cell_angle_beta 105.8931
_cell_angle_gamma 90.0000
loop_
_atom_site_label
_atom_site_type_symbol
_atom_site_fract_x
_atom_site_fract_y
_atom_site_fract_z
_atom_site_U_iso_or_equiv
_atom_site_adp_type
_atom_site_occupancy
S1 S 0.73344 0.34527 0.73816 0.00515 Uani 1.00
Mn1 Mn 0.50000 0.16639 0.50000 0.00631 Uani 1.00
S2 S 0.26261 0.50000 0.73914 0.00533 Uani 1.00
P1 P 0.55116 0.50000 0.65945 0.00440 Uani 1.00
loop_
_atom_site_aniso_label
_atom_site_aniso_U_11
_atom_site_aniso_U_22
_atom_site_aniso_U_33
_atom_site_aniso_U_12
_atom_site_aniso_U_13
_atom_site_aniso_U_23
S1 0.00451 0.00474 0.00637 0.00065 0.00178 0.00000
Mn1 0.00408 0.00639 0.00881 0.00000 0.00234 0.00000
S2 0.00376 0.00551 0.00776 0.00000 0.00335 0.00000
P1 0.00343 0.00529 0.00498 0.00000 0.00201 0.00000
loop_
```

```

_geom_bond_atom_site_label_1
_geom_bond_atom_site_label_2
_geom_bond_distance
_geom_bond_site_symmetry_2
_ccdc_geom_bond_type
S1 Mn1 2.758 . S
S1 P1 2.043 . S
S1 Mn1 2.706 7_656 S
Mn1 S1 2.758 2_656 S
Mn1 S1 2.706 8_455 S
Mn1 S1 2.706 7_656 S
Mn1 S2 2.737 6_546 S
Mn1 S2 2.737 5_545 S
S2 P1 2.036 . S
S2 Mn1 2.737 5_455 S
S2 Mn1 2.737 7_556 S
P1 S1 2.043 4_565 S
P1 P1 2.218 2_656 S

```

**Optimized CIF of the MnPS<sub>3</sub> monolayer**

```

data_MnPS3_Monolayer
_symmetry_space_group_name_H-M 'P1'
_symmetry_Int_Tables_number 1
_symmetry_cell_setting triclinic
loop_
_symmetry_equiv_pos_as_xyz
x,y,z
_cell_length_a 6.2823
_cell_length_b 6.2825
_cell_length_c 22.9087
_cell_angle_alpha 90.0000
_cell_angle_beta 90.0000
_cell_angle_gamma 120.0000
loop_
_atom_site_label
_atom_site_type_symbol
_atom_site_fract_x
_atom_site_fract_y
_atom_site_fract_z
_atom_site_U_iso_or_equiv
_atom_site_adp_type
_atom_site_occupancy
Mn1 Mn 0.33326 0.66669 0.50000 0.01267 Uiso 1.00
Mn2 Mn 0.66674 0.33331 0.50000 0.01267 Uiso 1.00
P1 P 0.00067 0.00095 0.45146 0.01267 Uiso 1.00
P2 P 0.99933 0.99905 0.54854 0.01267 Uiso 1.00
S1 S 0.00100 0.68878 0.42719 0.01267 Uiso 1.00
S2 S 0.99900 0.31122 0.57281 0.01267 Uiso 1.00

```

|    |   |         |         |         |         |      |      |
|----|---|---------|---------|---------|---------|------|------|
| S3 | S | 0.31370 | 0.31412 | 0.42724 | 0.01267 | Uiso | 1.00 |
| S4 | S | 0.68630 | 0.68588 | 0.57276 | 0.01267 | Uiso | 1.00 |
| S5 | S | 0.68835 | 0.00141 | 0.42721 | 0.01267 | Uiso | 1.00 |
| S6 | S | 0.31165 | 0.99859 | 0.57279 | 0.01267 | Uiso | 1.00 |

**Table S7.** Estimation of Gibb's Free Energy with contribution from laser source.

| Reaction product | $\Delta G$ (eV) | $h\nu$ (eV) |
|------------------|-----------------|-------------|
| $\text{NO}_3^-$  | -1.7            | 1.2         |
| $\text{HNO}_3$   | -1.9            | 1.1         |
| $\text{NO}_2$    | -2.9            | 1.1         |
| $\text{HNO}_2$   | -3              | 1.2         |
| $\text{NO}$      | -4.2            | 1.1         |
| $\text{HNO}$     | -4              | 1.2         |
| $\text{N}$       | -4.3            | 1.1         |
| $\text{NH}$      | -4.4            | 1.1         |
| $\text{NH}_2$    | -5.3            | 1.2         |
| $\text{NH}_3$    | -6.2            | 1.1         |

## References

1. Kovats, E., Helv. Chim. Acta, 1958, 41, 1915.
2. Van Den Dool, H., Kratz, P.D., J. Chromatography, 1963, 11, 463-471.
3. Lee, M.L., Vassilaros, D.L., White, C.M., Novotny, M., Anal. Chem., 1979, 51(6), 768-773.
